# Supplementary material for: Evaluating mAbs binding abilities to Omicron subvariant RBDs: implications for selecting effective mAb therapies
Source: Royal Society of Chemistry journal article supplement (doi:10.1039/d3cp05893j), 2024-01-01
Supplement: d3cp05893j1.pdf [file d3cp05893j1.pdf]

## Supporting Information

### **Evaluating mAbs Binding Abilities to Omicron Subvariant RBDs: Implications for Selecting Effective mAb Therapies**

*Song Luo, Danyang Xiong, Bolin Tang, Bangyu Liu, Xiaoyu Zhao, Lili*

*Duan\**

School of Physics and Electronics, Shandong Normal University, Jinan, 250014,

China

Corresponding author ([duanll@sdu.edu.cn](mailto:duanll@sdu.edu.cn))

Table S1  $\Delta\Delta G_{\text{ASIE}}$  calculated through ASIE method for LY-COV1404/RBDs systems, all values are in kcal/mol.

| <b>WT</b> | $\Delta\Delta G_{\text{ASIE}}$ | <b>BA.2</b> | $\Delta\Delta G_{\text{ASIE}}$ | <b>BA.5</b> | $\Delta\Delta G_{\text{ASIE}}$ | <b>BF.7</b> | $\Delta\Delta G_{\text{ASIE}}$ | <b>XBB.1.5</b> | $\Delta\Delta G_{\text{ASIE}}$ |
|-----------|--------------------------------|-------------|--------------------------------|-------------|--------------------------------|-------------|--------------------------------|----------------|--------------------------------|
| T345      | 0.04                           | T345        | 0.59                           | T345        | 0.06                           | T345        | 0.03                           | T345           | 0.39                           |
| R346      | -0.57                          | R346        | 0.77                           | R346        | -0.22                          | T346        | -0.01                          | T346           | 0.08                           |
| N439      | -0.61                          | N439        | 0.09                           | N439        | 0.30                           | N439        | 0.17                           | N439           | -0.09                          |
| N440      | -1.10                          | K440        | -1.94                          | K440        | 0.01                           | K440        | -1.97                          | K440           | -1.89                          |
| L441      | 0.71                           | L441        | 0.56                           | L441        | 1.04                           | L441        | 0.02                           | L441           | 0.98                           |
| S443      | 0.37                           | S443        | 0.27                           | S443        | 0.28                           | S443        | 0.96                           | S443           | 0.61                           |
| K444      | 2.50                           | K444        | 3.44                           | K444        | 3.14                           | K444        | 3.67                           | K444           | 1.20                           |
| V445      | 4.08                           | V445        | 3.49                           | V445        | 4.39                           | V445        | 4.42                           | P445           | 3.12                           |
| N448      | 0.90                           | N448        | 1.54                           | N448        | 1.84                           | N448        | 0.78                           | N448           | 0.53                           |
| Y449      | 0.60                           | Y449        | 0.93                           | Y449        | 0.90                           | Y449        | 0.69                           | Y449           | 0.08                           |
| N450      | -2.78                          | N450        | -5.34                          | N450        | -5.28                          | N450        | -2.33                          | N450           | -0.90                          |
| Y451      | 0.49                           | Y451        | 0.96                           | Y451        | 0.79                           | Y451        | 0.36                           | Y451           | 0.26                           |
| Q498      | 2.22                           | R498        | 0.03                           | R498        | 1.45                           | R498        | -0.96                          | R498           | 1.28                           |
| P499      | 1.48                           | P499        | 1.62                           | P499        | 1.92                           | P499        | 2.37                           | P499           | 2.12                           |
| T500      | 2.42                           | T500        | 2.01                           | T500        | 2.30                           | T500        | 2.51                           | T500           | 3.76                           |
| Q506      | 0.21                           | Q506        | 0.12                           | Q506        | 0.09                           | Q506        | 0.16                           | Q506           | 0.54                           |
| R509      | 0.24                           | R509        | -0.54                          | R509        | 0.72                           | R509        | 0.32                           | R509           | 0.30                           |

Table S2  $\Delta\Delta G_{ASIE}$  calculated through ASIE method for REGN-10933/RBDs systems, all values are in kcal/mol.

| WT       | $\Delta\Delta G_{ASIE}$ | BA.<br>2 | $\Delta\Delta G_{ASIE}$ | BA.<br>5 | $\Delta\Delta G_{ASIE}$ | BF.7     | $\Delta\Delta G_{ASIE}$ | XBB.1.<br>5 | $\Delta\Delta G_{ASIE}$ |
|----------|-------------------------|----------|-------------------------|----------|-------------------------|----------|-------------------------|-------------|-------------------------|
| R40<br>3 | 0.01                    | R40<br>3 | -3.32                   | R40<br>3 | -0.54                   | R40<br>3 | -1.38                   | R403        | -3.75                   |
| D40<br>5 | 1.08                    | N40<br>5 | -0.13                   | N40<br>5 | -0.21                   | N40<br>5 | 0.75                    | N405        | -0.16                   |
| E40<br>6 | 0.37                    | E40<br>6 | 0.47                    | E40<br>6 | -0.06                   | E40<br>6 | -0.98                   | E406        | -0.10                   |
| Q40<br>9 | -0.02                   | Q40<br>9 | 0.10                    | Q40<br>9 | -0.04                   | Q40<br>9 | 1.21                    | Q409        | 0.02                    |
| K41<br>7 | -1.73                   | N41<br>7 | 0.13                    | N41<br>7 | -0.63                   | N41<br>7 | 1.57                    | N417        | 0.01                    |
| I418     | 0.01                    | I418     | 0.11                    | I418     | 0.01                    | I418     | 0.71                    | I418        | 0.07                    |
| D42<br>0 | 0.12                    | D42<br>0 | -2.95                   | D42<br>0 | -0.10                   | D42<br>0 | -0.04                   | D420        | 0.05                    |
| Y43<br>1 | 0.02                    | Y43<br>1 | 2.31                    | Y43<br>1 | 0.19                    | Y43<br>1 | 0.33                    | Y431        | 1.02                    |
| Y45<br>3 | 0.10                    | Y45<br>3 | 1.42                    | Y45<br>3 | -0.05                   | Y45<br>3 | 0.63                    | Y453        | -0.51                   |
| L45<br>5 | 0.67                    | L45<br>5 | 0.96                    | L45<br>5 | 0.20                    | L45<br>5 | 1.29                    | L455        | 3.23                    |
| F456     | -0.12                   | F456     | 0.35                    | F456     | 1.83                    | F456     | 0.90                    | F456        | 2.54                    |
| K45<br>8 | -0.05                   | K45<br>8 | -0.18                   | K45<br>8 | -1.19                   | K45<br>8 | 0.04                    | K458        | 0.08                    |
| I472     | 0.00                    | I472     | 0.09                    | I472     | 1.77                    | I472     | 0.01                    | I472        | 0.00                    |
| Y47<br>3 | 1.17                    | Y47<br>3 | 0.55                    | Y47<br>3 | 0.59                    | Y47<br>3 | 0.06                    | Y473        | 2.41                    |
| Q47<br>4 | -0.10                   | Q47<br>4 | -1.10                   | Q47<br>4 | -0.35                   | Q47<br>4 | -0.04                   | Q474        | 0.10                    |
| S477     | 0.38                    | N47<br>7 | -0.03                   | N47<br>7 | -3.37                   | N47<br>7 | -0.79                   | N477        | -3.69                   |
| T47<br>8 | 0.86                    | K47<br>8 | -0.18                   | K47<br>8 | -3.46                   | K47<br>8 | -0.35                   | K478        | 1.61                    |
| C48<br>0 | 0.04                    | C48<br>0 | -0.02                   | C48<br>0 | 0.05                    | C48<br>0 | 1.07                    | C480        | -0.06                   |
| N48<br>1 | -0.40                   | N48<br>1 | -0.25                   | N48<br>1 | -0.35                   | N48<br>1 | -0.72                   | N481        | 0.26                    |
| F486     | -0.43                   | F486     | 6.84                    | V48<br>6 | 0.88                    | V48<br>6 | 0.49                    | P486        | 0.38                    |

|          |       |          |      |          |       |          |       |      |      |
|----------|-------|----------|------|----------|-------|----------|-------|------|------|
| N48<br>7 | 1.07  | N48<br>7 | 0.00 | N48<br>7 | -1.70 | N48<br>7 | 3.61  | N487 | 0.67 |
| C48<br>8 | -0.12 | C48<br>8 | 1.10 | C48<br>8 | 1.33  | C48<br>8 | 0.13  | C488 | 0.85 |
| Y48<br>9 | 2.64  | Y48<br>9 | 0.02 | Y48<br>9 | 2.63  | Y48<br>9 | 8.12  | Y489 | 0.11 |
| P491     | 0.03  | P491     | 0.03 | P491     | 0.37  | P491     | 0.04  | P491 | 0.50 |
| Q49<br>3 | 0.11  | R49<br>3 | 6.05 | Q49<br>3 | 0.08  | Q49<br>3 | -0.13 | Q493 | 0.10 |
| Y50<br>5 | -0.36 | H50<br>5 | 0.27 | H50<br>5 | -0.19 | H50<br>5 | 0.86  | H505 | 0.28 |

Table S3  $\Delta\Delta G_{ASIE}$  calculated through ASIE method for REGN-10987/RBDs systems, all values are in kcal/mol.

| <b>WT</b> | $\Delta\Delta G_{ASIE}$ | <b>BA.2</b> | $\Delta\Delta G_{ASIE}$ | <b>BA.5</b> | $\Delta\Delta G_{ASIE}$ | <b>BF.7</b> | $\Delta\Delta G_{ASIE}$ | <b>XBB.1.5</b> | $\Delta\Delta G_{ASIE}$ |
|-----------|-------------------------|-------------|-------------------------|-------------|-------------------------|-------------|-------------------------|----------------|-------------------------|
| R346      | -0.42                   | R346        | -1.00                   | R346        | -0.66                   | T346        | 0.00                    | T346           | -0.02                   |
| N437      | 0.00                    | N437        | 0.05                    | N437        | 0.00                    | N437        | 0.00                    | N437           | 1.27                    |
| N439      | 0.02                    | N439        | 0.37                    | N439        | -0.09                   | N439        | 0.01                    | N439           | 0.51                    |
| N440      | -0.05                   | K440        | -1.22                   | K440        | -3.08                   | K440        | -0.48                   | K440           | 0.26                    |
| D442      | 0.35                    | D442        | 0.85                    | D442        | 0.37                    | D442        | 0.50                    | D442           | 0.47                    |
| S443      | -0.11                   | S443        | -0.85                   | S443        | 0.06                    | S443        | 0.00                    | S443           | 0.16                    |
| K444      | 0.03                    | K444        | 1.36                    | K444        | 0.43                    | K444        | -0.86                   | K444           | -1.02                   |
| V445      | 2.51                    | V445        | 2.60                    | V445        | 2.17                    | V445        | -0.08                   | P445           | 2.12                    |
| Y449      | 1.40                    | Y449        | 0.41                    | Y449        | 4.64                    | Y449        | 1.80                    | Y449           | -0.44                   |
| N450      | -0.54                   | N450        | -0.11                   | N450        | -0.08                   | N450        | -0.17                   | N450           | -0.05                   |
| L452      | 0.20                    | L452        | 0.03                    | R452        | -0.41                   | R452        | -0.99                   | L452           | 0.00                    |
| S494      | 1.06                    | S494        | 0.00                    | S494        | 0.15                    | S494        | -0.31                   | S494           | 0.00                    |
| Q498      | 2.19                    | R498        | -0.62                   | R498        | 1.17                    | R498        | 3.56                    | R498           | 2.30                    |
| P499      | 1.37                    | P499        | 0.56                    | P499        | -0.76                   | P499        | 0.09                    | P499           | 1.07                    |
| T500      | 1.80                    | T500        | 0.38                    | T500        | 0.18                    | T500        | -0.71                   | T500           | 4.79                    |
| N501      | -0.46                   | Y501        | 0.10                    | Y501        | 0.15                    | Y501        | 3.80                    | Y501           | 0.54                    |
| V503      | 0.00                    | V503        | 0.00                    | V503        | -0.01                   | V503        | 0.02                    | V503           | 0.93                    |
| Y505      | 0.30                    | H505        | -0.01                   | H505        | -0.01                   | H505        | 2.14                    | H505           | 0.04                    |
| Q506      | 0.04                    | Q506        | 0.22                    | Q506        | 0.00                    | Q506        | 0.08                    | Q506           | 1.97                    |
| Y508      | 0.03                    | Y508        | 0.06                    | Y508        | 0.02                    | Y508        | 0.04                    | Y508           | 0.99                    |
| R509      | -0.42                   | R509        | 0.32                    | R509        | -0.45                   | R509        | -0.54                   | R509           | -0.52                   |

Table S4  $\Delta\Delta G_{\text{ASIE}}$  calculated through ASIE method for 002-S21F2/RBDs

systems, all values are in kcal/mol.

| <b>WT</b>   | $\Delta\Delta G_{\text{ASIE}}$ | <b>BA.2</b> | $\Delta\Delta G_{\text{ASIE}}$ | <b>BA.5</b> | $\Delta\Delta G_{\text{ASIE}}$ | <b>BF.7</b> | $\Delta\Delta G_{\text{ASIE}}$ | <b>XBB.1.5</b> | $\Delta\Delta G_{\text{ASIE}}$ |
|-------------|--------------------------------|-------------|--------------------------------|-------------|--------------------------------|-------------|--------------------------------|----------------|--------------------------------|
| <b>E340</b> | -0.17                          | E340        | -0.08                          | E340        | -0.85                          | E340        | 0.47                           | E340           | 0.10                           |
| <b>N343</b> | 0.49                           | N343        | 0.59                           | N343        | 0.31                           | N343        | 0.57                           | N343           | 1.14                           |
| T345        | 2.50                           | T345        | 3.03                           | T345        | 2.37                           | T345        | 1.56                           | T345           | 1.43                           |
| R346        | 5.13                           | R346        | 3.71                           | R346        | 6.54                           | T346        | 1.24                           | T346           | 0.04                           |
| K356        | -0.62                          | K356        | -0.20                          | K356        | -0.88                          | K356        | -0.41                          | K356           | -0.23                          |
| N440        | -0.75                          | K440        | 0.06                           | K440        | -0.13                          | K440        | 0.62                           | K440           | -0.64                          |
| L441        | 1.97                           | L441        | 1.82                           | L441        | 2.01                           | L441        | 1.60                           | L441           | 2.03                           |
| K444        | -0.40                          | K444        | -0.13                          | K444        | 2.44                           | K444        | 0.37                           | K444           | -0.64                          |
| V445        | 0.95                           | V445        | 1.12                           | V445        | 0.30                           | V445        | 0.57                           | P445           | 0.64                           |
| N448        | 0.44                           | N448        | 0.29                           | N448        | 0.84                           | N448        | 0.27                           | N448           | 0.55                           |
| N450        | -0.47                          | N450        | -0.57                          | N450        | -0.69                          | N450        | -0.27                          | N450           | -0.37                          |
| Y451        | 0.45                           | Y451        | 0.42                           | Y451        | 0.80                           | Y451        | 0.45                           | Y451           | 0.38                           |
| P499        | 0.56                           | P499        | 0.77                           | P499        | 0.15                           | P499        | 0.41                           | P499           | 0.46                           |
| R509        | 0.86                           | R509        | 1.11                           | R509        | 0.79                           | R509        | 0.48                           | R509           | 1.09                           |

Table S5  $\Delta\Delta G_{ASIE}$  calculated through ASIE method for 1D1/RBDs

systems, all values are in kcal/mol.

| <b>WT</b>   | $\Delta\Delta G_{ASIE}$ | <b>BA.2</b> | $\Delta\Delta G_{ASIE}$ | <b>BA.5</b> | $\Delta\Delta G_{ASIE}$ | <b>BF.7</b> | $\Delta\Delta G_{ASIE}$ | <b>XBB.1.5</b> | $\Delta\Delta G_{ASIE}$ |
|-------------|-------------------------|-------------|-------------------------|-------------|-------------------------|-------------|-------------------------|----------------|-------------------------|
| <b>R403</b> | -1.26                   | R403        | -1.43                   | R403        | -0.81                   | R403        | -1.09                   | R403           | -1.65                   |
| <b>D405</b> | -0.18                   | N405        | -1.27                   | N405        | -1.79                   | N405        | -1.05                   | N405           | -0.36                   |
| <b>T415</b> | 0.83                    | T415        | 1.00                    | T415        | 0.71                    | T415        | 1.05                    | T415           | 0.99                    |
| <b>K417</b> | 1.89                    | N417        | 0.30                    | N417        | 0.23                    | N417        | 0.37                    | N417           | 0.25                    |
| <b>D420</b> | -2.99                   | D420        | -3.63                   | D420        | -3.97                   | D420        | -3.04                   | D420           | -3.06                   |
| <b>Y421</b> | 2.30                    | Y421        | 2.51                    | Y421        | 2.78                    | Y421        | 2.30                    | Y421           | 3.55                    |
| <b>Y453</b> | 0.51                    | Y453        | 0.41                    | Y453        | 0.43                    | Y453        | 0.41                    | Y453           | 0.48                    |
| <b>L455</b> | 2.44                    | L455        | 2.93                    | L455        | 2.27                    | L455        | 2.09                    | L455           | 2.79                    |
| <b>F456</b> | 2.53                    | F456        | 2.60                    | F456        | 2.35                    | F456        | 2.31                    | F456           | 2.54                    |
| <b>K458</b> | 0.62                    | K458        | 0.64                    | K458        | 0.37                    | K458        | 0.58                    | K458           | 1.14                    |
| <b>Y473</b> | 1.39                    | Y473        | 1.43                    | Y473        | 1.34                    | Y473        | 1.51                    | Y473           | 1.27                    |
| <b>T478</b> | -0.07                   | K478        | -0.98                   | K478        | -0.61                   | K478        | -0.58                   | K478           | -0.42                   |
| <b>F486</b> | 0.91                    | F486        | 0.38                    | V486        | 0.00                    | V486        | -0.12                   | P486           | 0.41                    |
| <b>N487</b> | 2.02                    | N487        | 1.51                    | N487        | 2.51                    | N487        | 0.90                    | N487           | 1.83                    |
| <b>Y489</b> | 1.91                    | Y489        | 0.39                    | Y489        | 2.24                    | Y489        | 1.87                    | Y489           | 2.06                    |
| <b>Q498</b> | -0.65                   | R498        | -0.19                   | R498        | -0.10                   | R498        | -0.21                   | R498           | -0.13                   |
| <b>N501</b> | -0.54                   | Y501        | 1.50                    | Y501        | 1.37                    | Y501        | 1.39                    | Y501           | 1.53                    |
| <b>Y505</b> | 5.06                    | H505        | 3.73                    | H505        | 3.18                    | H505        | 3.37                    | H505           | 3.63                    |

Table S6  $\Delta\Delta G_{ASIE}$  calculated through ASIE method for 47D11/RBDs

systems, all values are in kcal/mol.

| <b>WT</b>   | $\Delta\Delta G_{ASIE}$ | <b>BA.2</b> | $\Delta\Delta G_{ASIE}$ | <b>BA.5</b> | $\Delta\Delta G_{ASIE}$ | <b>BF.7</b> | $\Delta\Delta G_{ASIE}$ | <b>XBB.1.5</b> | $\Delta\Delta G_{ASIE}$ |
|-------------|-------------------------|-------------|-------------------------|-------------|-------------------------|-------------|-------------------------|----------------|-------------------------|
| <b>N334</b> | -0.05                   | N334        | 1.28                    | N334        | 0.25                    | N334        | 0.30                    | N334           | 0.60                    |
| <b>L335</b> | 3.75                    | L335        | 4.11                    | L335        | 4.90                    | N334        | 0.30                    | L335           | 4.05                    |
| <b>P337</b> | 0.77                    | P337        | 0.67                    | P337        | 1.01                    | L335        | 3.67                    | P337           | 0.84                    |
| <b>F338</b> | 0.30                    | F338        | 1.14                    | F338        | 0.48                    | P337        | 0.55                    | F338           | 1.20                    |
| <b>D339</b> | 0.00                    | D339        | 0.99                    | D339        | 1.45                    | F338        | 0.76                    | H339           | 5.85                    |
| <b>F342</b> | 0.70                    | F342        | 0.86                    | F342        | 0.88                    | D339        | 1.24                    | F342           | 0.14                    |
| <b>N343</b> | 0.57                    | N343        | 0.33                    | N343        | 0.97                    | N343        | 0.36                    | N343           | 0.45                    |
| <b>V362</b> | 0.20                    | V362        | 0.18                    | V362        | 0.04                    | V362        | 0.13                    | V362           | 0.62                    |
| <b>D364</b> | 0.47                    | D364        | -1.66                   | D364        | 1.19                    | D364        | 1.17                    | D364           | 0.00                    |
| <b>Y365</b> | 0.40                    | Y365        | 0.43                    | Y365        | 0.09                    | Y365        | 0.11                    | H365           | 0.88                    |
| <b>V367</b> | 0.99                    | V367        | 0.84                    | V367        | 1.51                    | V367        | 1.15                    | V367           | 0.88                    |
| <b>L368</b> | 0.80                    | L368        | 0.55                    | L368        | 1.04                    | L368        | 1.01                    | I368           | 1.66                    |
| <b>S371</b> | 0.17                    | F371        | -0.65                   | F371        | 2.89                    | F371        | 1.72                    | F371           | 0.45                    |
| <b>S373</b> | -0.07                   | P373        | 0.67                    | P373        | 0.33                    | P373        | 0.32                    | P373           | 0.47                    |
| <b>F374</b> | 0.23                    | F374        | 0.77                    | F374        | 0.74                    | F374        | 0.50                    | F374           | 0.00                    |
| <b>N388</b> | 0.04                    | N388        | 0.25                    | N388        | -0.58                   | N388        | -0.40                   | N388           | 0.20                    |
| <b>P527</b> | 0.42                    | P527        | 0.46                    | P527        | 1.50                    | P527        | 1.32                    | P527           | 0.73                    |
